# Supplementary material
Source: PubMed Central journal article supplement (PMC3397841)
Supplement: supp_M112.364216_jbc.M112.364216-1.pdf [file supp_M112.364216_jbc.M112.364216-1.pdf]

## SUPPLEMENTAL DATA

### Cytochrome P450-type hydroxylation and epoxidation in a tyrosine-liganded hemoprotein, catalase-related allene oxide synthase

William E. Boeglin & Alan R. Brash

- Fig. S1 **SP-HPLC separation of the methyl esters of *erythro* and *threo* 8*R*-hydroxy-9,10-epoxy-eicosatrienoates (Products 1 and 2).**
- Fig. S2 **Illustrating the identity of the <sup>1</sup>H-NMR spectra (2.5 – 6 ppm) of the methyl ester of cAOS/PhIO- and mCPBA-derived Product 1.**
- Fig. S3 **RP-HPLC analysis of the products formed from 8*S*-HETE by cAOS/PhIO.**
- Fig. S4 **Identification of 8,13-diHETE, product of 8*S*-HETE with cAOS/PhIO.**
- Fig. S5 **Assignment of the 13-hydroxyl configuration in cAOS-derived 8*S*,13-diHETE as 13*R*.**
- Fig. S6 **Identification of 8,16-diHETE, product of 8*S*-HETE with cAOS/PhIO.**
- Fig. S7 **Chiral analysis of 5,6-EET, product of Arachidonic Acid with cAOS/PhIO.**
- Fig. S8 **Chiral analysis of 14,15-EET, product of Arachidonic Acid with cAOS/PhIO.**
- Fig. S9 **Chiral analysis of 10-HETE, product of Arachidonic Acid with cAOS/PhIO.**

Pages 10-12, List of NMR data.

Page 12, SI references.

Supplement Fig. S1: **SP-HPLC separation of the methyl esters of *erythro* and *threo* 8*R*-hydroxy-9,10-epoxy-eicosatrienoates (Products 1 and 2)**

Column: Thomson Advantage 5 $\mu$  silica (25 x 0.46 cm); Solvent: of hexane/isopropanol (100:1, v/v), using a flow rate of 1 ml/min, with UV detection at 205 nm.

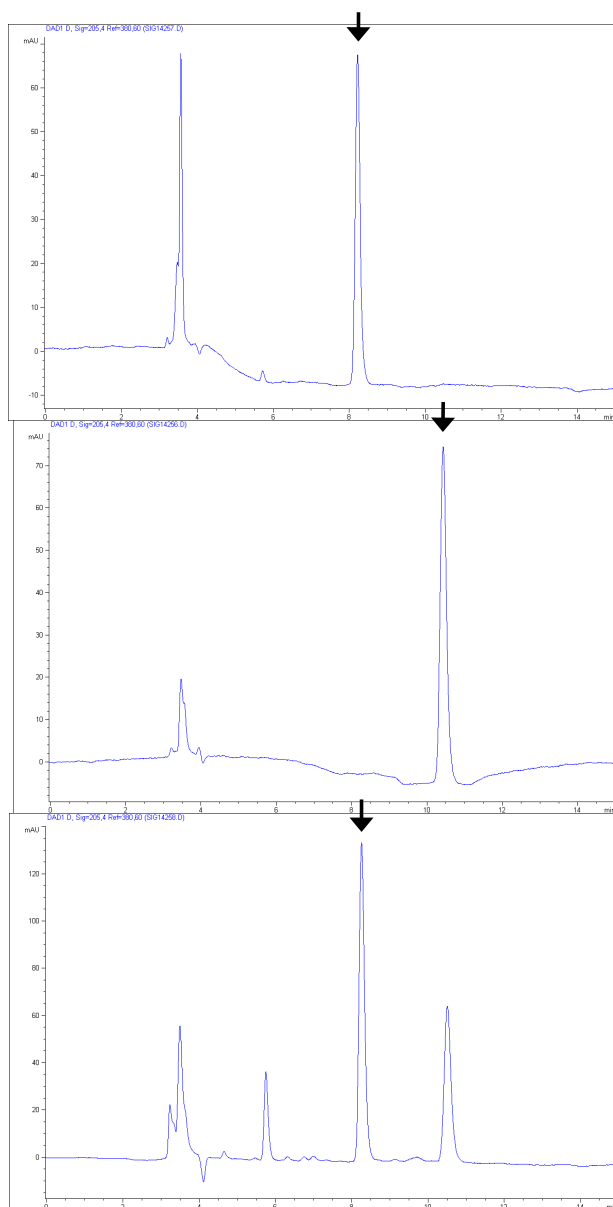

Product 1 (*erythro*), from  
cAOS-PhIO-8*R*-HETE  
incubation

Product 2 (*threo*), from  
mCPBA reaction with 8*R*-HETE

Product 1 (arrow) from cAOS-PhIO,  
co-injected with a 50:50 mix  
of *erythro*/*threo* standards  
(mCPBA products)

Supplement Fig. S2

**Fig. S2. Illustrating the identity of the  $^1\text{H-NMR}$  spectra (2.5 – 6 ppm) of the methyl ester of cAOS/PhIO- and mCPBA-derived Product 1.** The spectra were recorded in  $d_6$ -benzene at 283 K.

Top: cAOS/PhIO product 1

Below: mCPBA product 1

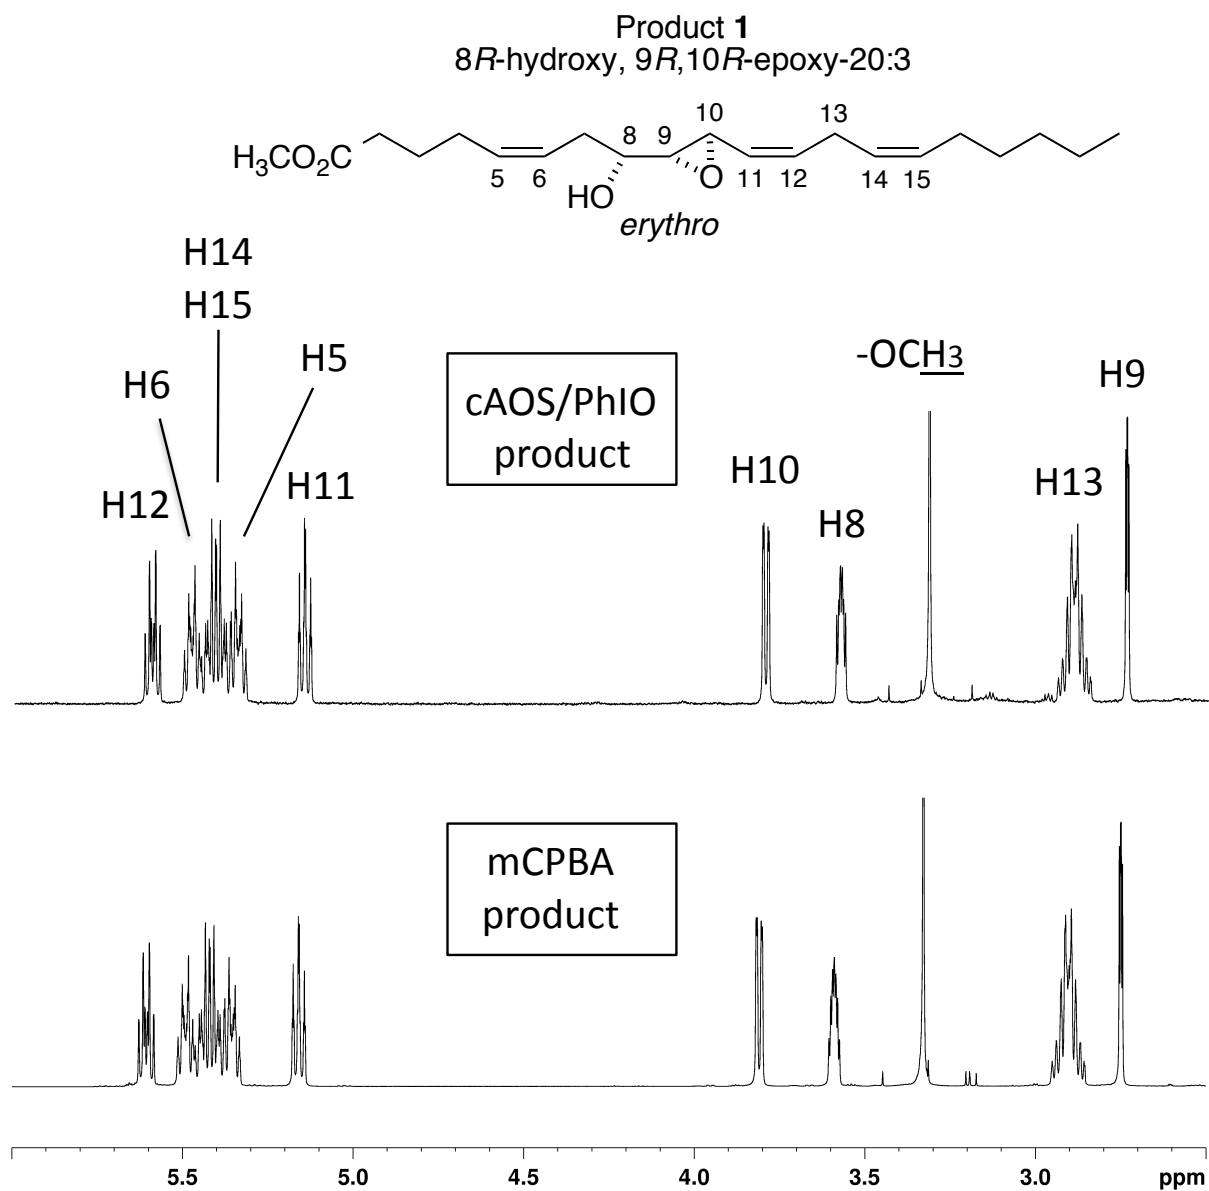

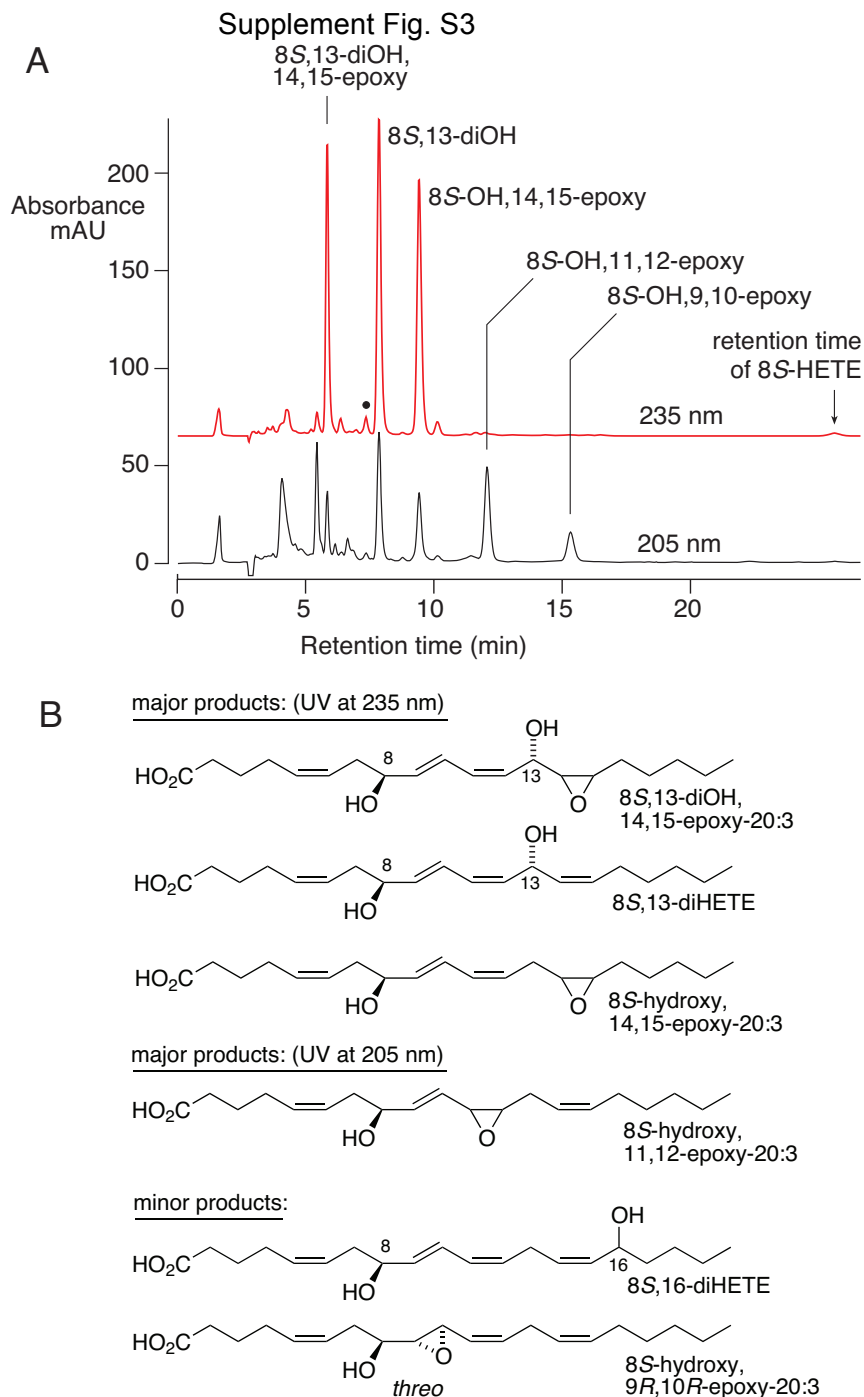

**Fig. S3. RP-HPLC analysis of the products products formed from 8S-HETE by cAOS/PhIO**  
 (A) 8S-HETE (150  $\mu$ M) was reacted with cAOS in the presence of 300  $\mu$ M PhIO for 3 min at room temperature. Following extraction and formation of the methyl esters using diazomethane, an aliquot was analyzed on a Thomson Instrument Co. Advantage C18 column (25 x 0.46 cm) using a solvent system of MeOH/H<sub>2</sub>O/HAc (80/20/0.01 by volume) and a flow rate of 1 ml/min. As in Fig. 2A and 5A (main text), the UV traces of 205 nm and 235 nm are at the same sensitivity and are offset for clarity. The black dot at ~7.5 min marks a small peak identified by GC-MS, after hydrogenation, as 8R,16-diHETE (Fig S6). (B) Structures of the products identified (NMR and GC-MS data included in SI).

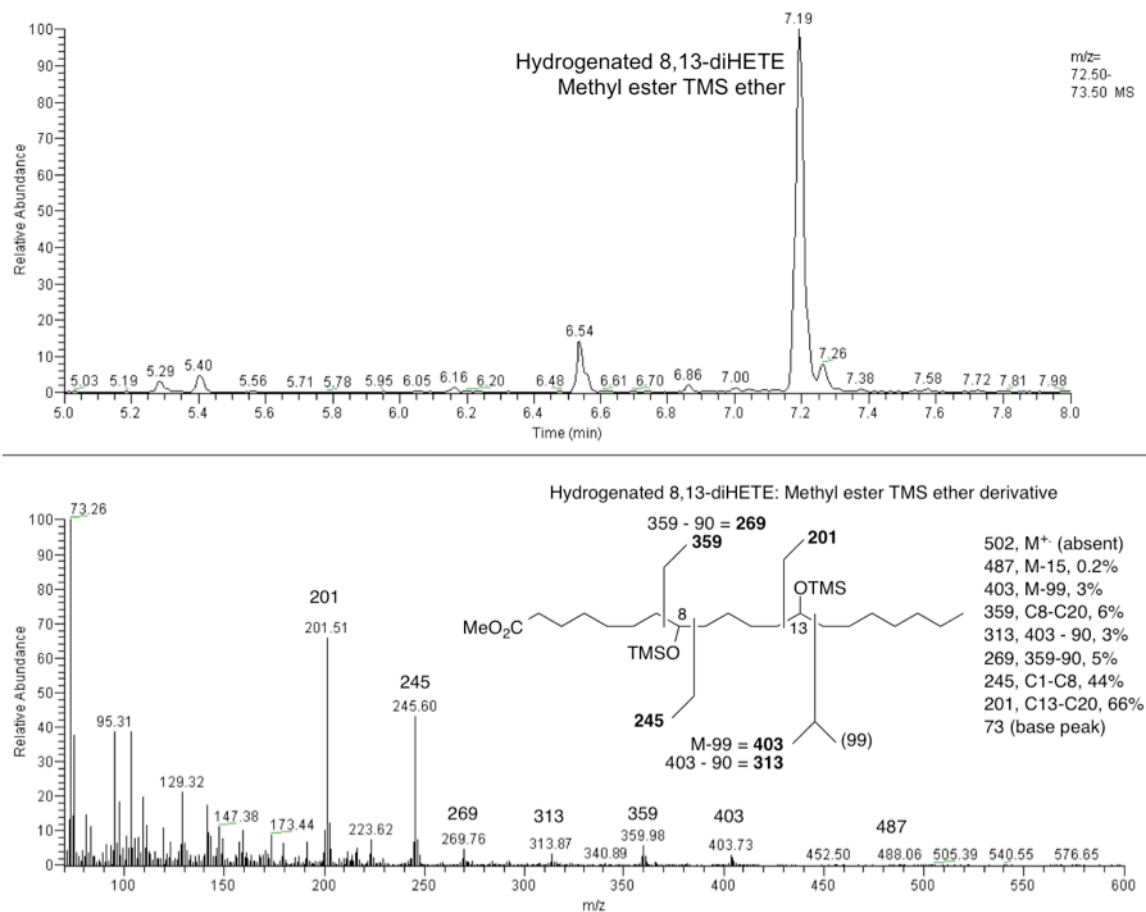

**Fig. S4. Identification of 8,13-diHETE, product of 8S-HETE with cAOS/PhIO**

8,13-diHETE methyl ester was hydrogenated, converted to the trimethylsilyl ether (TMS) derivative and analyzed by GC-MS. Top: GC profile at m/z 73 (equivalent to any compounds containing TMS). Lower panel: Electron impact mass spectrum. Diagnostic ions are listed in the lower panel and illustrated on the structure.

## Assignment of the 13-hydroxyl configuration in 8*S*,13-diHETE, product of 8*S*-HETE/cAOS/PhIO

Chiral 13-HETE enantiomers were prepared by: (i) Vitamin E-controlled autoxidation of arachidonate PFB ester, using 500% excess of vitamin E, and purification of 13-HETE PFB ester. (ii) Resolution of 13-HETE enantiomers as the PFB esters using a Chiralpak AD column (solvent hexane/MeOH, 100:2 v/v). (iii) Assignment of the 13*R*/13*S* configurations by mild acid (0.1% acetic acid) treatment of the individual 13-HETE free acid enantiomers followed by purification and chiral analysis of the 11-HETE and 15-HETE products (cf. SI-ref 2). Then standards of 8,13-diHETE were prepared by: (iv) Reaction of 13*S*-HETE with 8*R*-LOX to produce 8*R*,13*S*-diHETE as standard. (v) Vitamin E-controlled autoxidation of 13-HETE PFB ester followed by isolation the two diastereomers of 8,13-diHETE as standards: structures confirmed by GC-MS. (vi) Comparison of the cAOS/PhIO/8*S*-HETE-derived 8,13-diHETE with the 8*R*,13*S*-diHETE and the pair of diastereomers (Fig. S7).

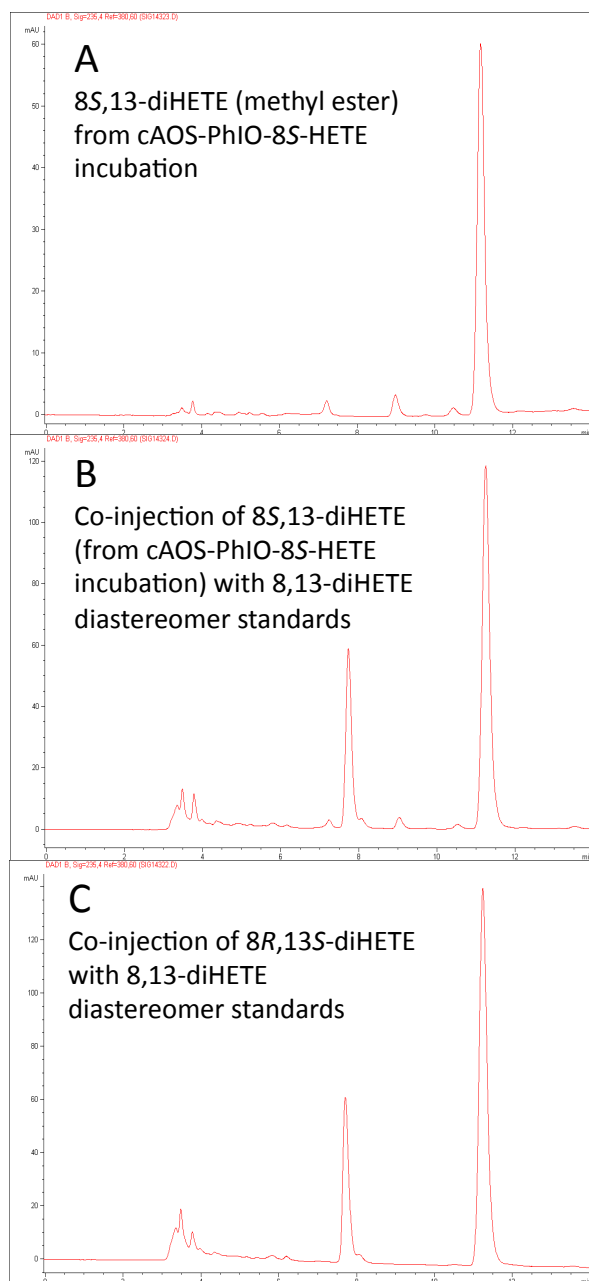

**Fig. S5: Assignment of the 13-hydroxyl configuration in cAOS-derived 8*S*,13-diHETE as 13*R*.**

Column: Thomson Advantage 5 $\mu$  silica (25 x 0.46 cm), solvent, hexane/IPA (95:5 v/v), flow rate 1 ml/min, UV detection at 235 nm.

**Panel A:** SP-HPLC of the 8*S*,13-diHETE product from cAOS/PhIO/8*S*-HETE (methyl ester derivative), which elutes at a retention time of 11.2 min.

**Panel B:** as shown by co-injection, the 8*S*-HETE-derived 8,13-diHETE co-chromatographed with the second of the two diastereomeric standards.

**Panel C:** The standard of 8*R*,13*S*-diHETE also co-chromatographed with the second diastereomer.

**Co-chromatography of the cAOS/PhIO/8*S*-HETE product and the 8*R*,13*S*-diHETE standard indicates that the two are enantiomers. Thus, the 8*S*-HETE-derived 8,13-diHETE is 8*S*,13*R*-diHETE.**

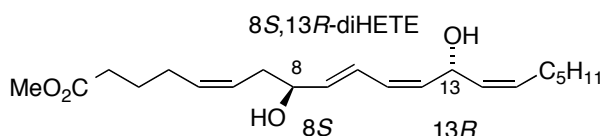

## Supplement Fig. S6

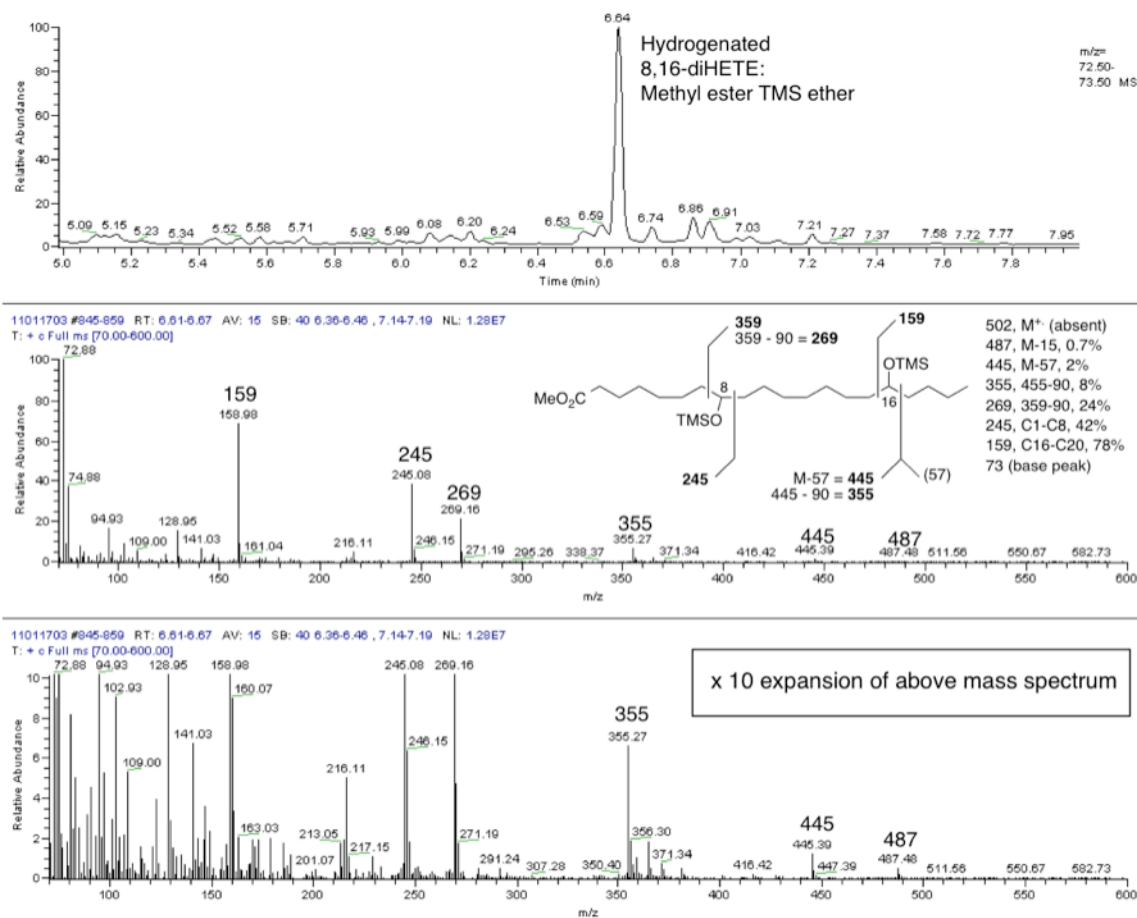

### Fig. S6. Identification of 8,16-diHETE, product of 8S-HETE with cAOS/PhIO

The peak marked with a dot in Fig S1A, was hydrogenated, converted to the trimethylsilyl ether (TMS) derivative and analyzed by GC-MS. Top: GC profile at m/z 73 (equivalent to any compounds containing TMS). Middle and lower panels: Electron impact mass spectrum. Diagnostic ions are listed in the middle panel and illustrated on the structure.

**Fig. S7. Chiral analysis of 5,6-EET (top), product of Arachidonic Acid with cAOS/PhIO**  
 5,6-EET was chromatographed on a Chiralcel OJ column (25 x 0.46 cm) as described (SI ref 1) using a solvent of hexane/isopropanol/glacial acetic acid (100:0.5:0.1, by vol.) at a flow rate of 1 ml/min, with UV detection at 205 nm. Chiral assignment was established under these conditions using synthetic standards (SI ref 1).

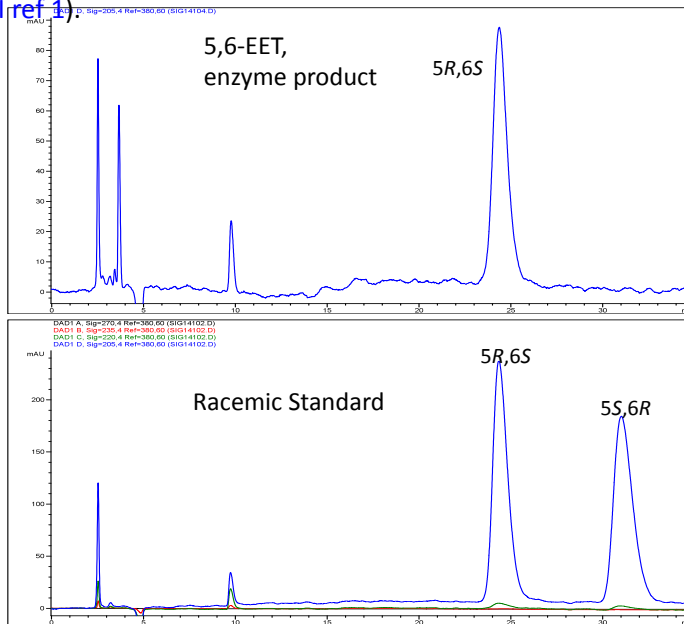

**Fig. S8. Chiral analysis of 14,15-EET (top), product of Arachidonic Acid with cAOS/PhIO**  
 14,15-EET was chromatographed on a Chiralcel OJ column (25 x 0.46 cm) as described (SI ref 1) using a solvent of hexane/isopropanol/glacial acetic acid (100:0.5:0.1, by vol.) at a flow rate of 1 ml/min, with UV detection at 205 nm. Chiral assignment was established under these conditions using synthetic standards (SI ref 1).

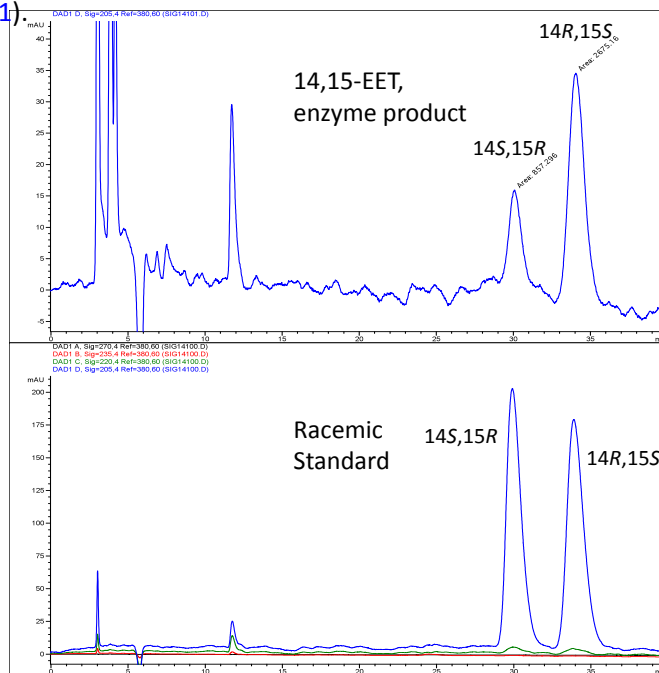



**Fig. S9. Chiral analysis of 10-HETE, product of Arachidonic Acid with cAOS/PhIO**

10-HETE was converted to the pentafluorobenzyl ester (PFB) and chromatographed on a Chiralpak AD column (25 x 0.46 cm) using a solvent of hexane/methanol (100:2, v/v) at a flow rate of 1 ml/min, with UV detection at 205 nm. The panel sizes below are adjusted to match retention times on the x-axis.

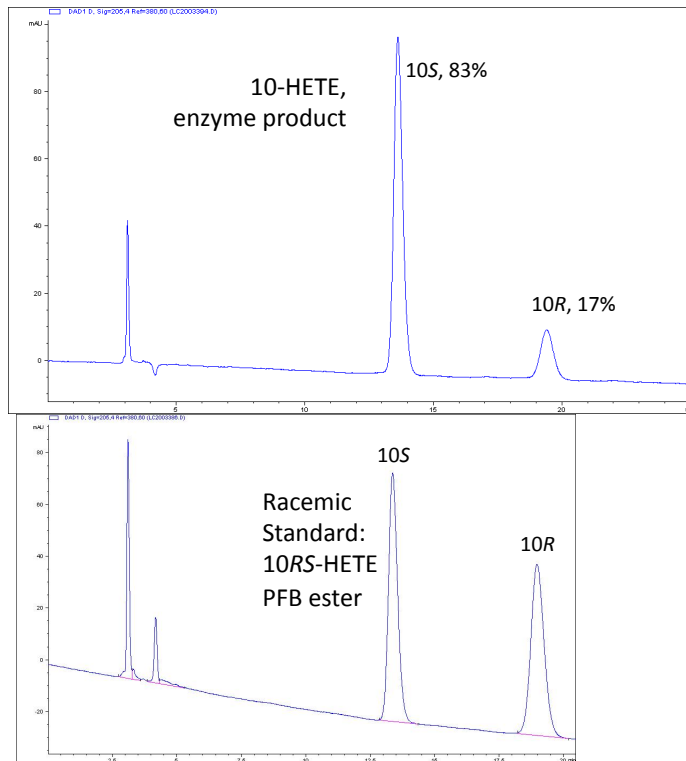

The enantiomers of 10RS-HETE are well resolved by chiral HPLC as the PFB ester, (Supplemental Fig S9, above). Assignment of the enantiomers was established by rearrangement of the earlier-eluting chiral column peak to 8S-HETE and 12R-HETE, and the later peak to 8R-HETE and 12S-HETE, on exposure to 0.1% acetic acid. The rearrangement occurs with partial retention of the hydroxyl oxygen (SI ref 2) and is therefore assumed to be suprafacial, hence the assignment of the early eluting peak as 10S-HETE. The assignment using this method was confirmed by comparison to 10S-HETE prepared by total chemical synthesis (cf. SI ref 2).

## NMR data

**Product 1, 8R-hydroxy-9R,10R-epoxy-eicosa-5Z,11Z,14Z-trienoate (methyl ester)** (The *erythro* 8,9 diastereomer). <sup>1</sup>H-NMR, 600 MHz, C<sub>6</sub>D<sub>6</sub>, 283 K, δ 5.61, dt, 1H, H12, J<sub>11,12</sub> = 10.9 Hz, J<sub>12,13</sub> = 7.7 Hz; 5.49, 1H, H6; 5.45 - 5.38, m, 2H, H14, H15; 5.36, m, 1H, H6; 5.155, dd, 1H, H11, J<sub>11,12</sub> = 10.8 Hz, J<sub>10,11</sub> = 9.9 Hz; 3.81, dd, 1H, H10, J<sub>9,10</sub> = 2 Hz, J<sub>10,11</sub> = 8.9 Hz; 3.59, m, 1H, H8; 3.33, s, 3H, OCH<sub>3</sub>; 2.905, m, 2H, H13; 2.75, dd, 1H, H9, J<sub>8,9</sub> = 3.4 Hz, J<sub>9,10</sub> = 2 Hz; 2.24, m, 2H, H7; 2.08, t, 2H, H2; 2.00, q, 2H, H16; 1.91, m, 2H, H4; 1.57, p, 2H, H3; 1.34 - 1.21, m, 6H, H17, H18, H19; 0.89, t, 3H, H20.

(In spectra recorded at a temperature of 288 K compared to 283 K, the H10 epoxide signal shifts upfield by ~0.02-0.03 ppm at the higher temperature, from 3.81 to ~3.78 ppm).

**Product 2, 8R-hydroxy-9S,10S-epoxy-eicosa-5Z,11Z,14Z-trienoate (methyl ester)** (The *threo* 8,9 diastereomer). <sup>1</sup>H-NMR, 600 MHz, C<sub>6</sub>D<sub>6</sub>, 285 K, δ 5.95, dt, 1H, H12, J<sub>11,12</sub> = 10.9 Hz, J<sub>12,13</sub> = 7.7 Hz; ~5.46 - 5.35, 3H, H6, H14, H15; 5.34, m, 1H, H5; 5.13, t, 1H, H11, J = 10 Hz; 3.72, dd, 1H, H10, J<sub>9,10</sub> = 2 Hz, J<sub>10,11</sub> = 8.9 Hz; 3.405, m, 1H, H8; 3.34, s, 3H, OCH<sub>3</sub>; 2.88, m, 2H, H13; 2.745, dd, 1H, H9, J<sub>8,9</sub> = 4.0 Hz, J<sub>9,10</sub> = 2 Hz; 2.23, m, 2H, H7; 2.06, dt (!), 2H, H2; 1.99, q, 2H, H16; 1.91, m, 2H, H4; 1.70, d, 1H, OH (H8) J = 2 Hz; 1.55, p, 2H, H3; 1.33 - 1.20, m, 6H, H17, H18, H19; 0.89, t, 3H, H20.

**8S-HETE product: 8S,13-dihydroxy-14,15-epoxy-eicosa-5Z,9E,11Z-trienoate (methyl ester)**  
<sup>1</sup>H-NMR, 600 MHz, CDCl<sub>3</sub>, 285 K, δ 6.55, dd, 1H, H10, J<sub>10,11</sub> = 11.3, J<sub>9,10</sub> = 15.1 Hz; 6.185, t, 1H, H11, J = 11.1 Hz; 5.84, dd, 1H, H9, J<sub>8,9</sub> = 5.8, J<sub>9,10</sub> = 15.1 Hz; 5.54, m, 1H, H5; 5.51, (dd?/m), 1H, H12; 5.42, m, 1H, H6; 4.44, t, 1H, H13, J = 8.1 Hz; 4.23, m 1H, H8; 3.65, s, 3H, OCH<sub>3</sub>; 3.035, m, 2H, H14, H15; 2.39-2.27, m 2H, H7,a,b; 2.32, t, 2H, H2; 2.095, q, 2H, H4; 2.065, d, 1H, OH (H13) J = 2 Hz; 1.825, d, 1H, OH (H8) J = 2 Hz; 1.70, p, 2H, H3; ~1.65-1.45, m, H16; 1.32-1.23, m, 6H, H17, H18, H19; 0.87, t, 3H, H20.

**8S-HETE product: 8S,13-dihydroxy-eicosa-5Z,9E,11Z,14Z-tetraenoate (methyl ester)**  
<sup>1</sup>H-NMR, 600 MHz, CDCl<sub>3</sub>, 285 K, δ 6.62, dd, 1H, H10, J<sub>10,11</sub> = 11.3, J<sub>9,10</sub> = 15.1 Hz; 6.04, t, 1H, H11, J = 11.1 Hz; 5.79, dd, 1H, H9, J<sub>8,9</sub> = 6.1, J<sub>9,10</sub> = 15.1 Hz; ~5.56 - 5.40, m, 6H, H5, H6, H12, H13, H14, H15; 4.24, m, 1H, H8; 3.67, s, 3H, OCH<sub>3</sub>; 2.40-2.27, m 2H, H7,a,b; 2.32, t, 2H, H2; ~2.19 - 2.08, m, 4H, H4, H16; 1.80, d, 1H, OH (H8) J = 4.3 Hz; 1.70, p, 2H, H3; 1.51, d, 1H, OH (H13) J = 2.4 Hz; 1.37, m, 2H, H16; 1.32-1.23, m, 6H, H17, H18, H19; 0.87, t, 3H, H20.

**8S-HETE product: 8S-hydroxy-14,15-epoxy-eicosa-5Z,9E,11Z-trienoate (methyl ester)**  
<sup>1</sup>H-NMR, 600 MHz, C<sub>6</sub>D<sub>6</sub>, 285 K, δ 6.60, dd, 1H, H10, J<sub>10,11</sub> = 11.2, J<sub>9,10</sub> = 15.1 Hz; 6.11, t, 1H, H11, J = 11 Hz; 5.62, dd, 1H, H9, J<sub>8,9</sub> = 5.8, J<sub>9,10</sub> = 15.2 Hz; 5.46, dt, 1H, H12, J<sub>11,12</sub> = 10.9 Hz, J<sub>12,13</sub> = 7.6 Hz; 5.41, m, 1H, H6; 5.35, m, 1H, H5; 4.00, m, 1H, H8; 3.32, s, 3H, OCH<sub>3</sub>; 2.785, dt, 1H, H14, J<sub>13,14</sub> = 6.3, J<sub>14,15</sub> = 4.1 Hz; 2.675, m, 1H, H15; 2.41, m, 1H, H13a; 2.28, m, 1H, H13b; 2.21, m, 1H, H7a; 2.16, m, 1H, H7b; 2.05, t, 2H, H2; 1.905, q, 2H, H4; 1.55, p, 2H, H3; 1.34, d, 1H, OH (H8), J = 4.4 Hz; ~1.44-1.22, m, 2H, H16; ~1.22-1.16, m, 6H, H17, H18, H19; 0.86, t, 3H, H20.

**8S-HETE + cAOS + PhIO product (8S-hydroxy-11,12-epoxy-eicosa-5Z,9E,14Z-trienoate (methyl ester))**  
<sup>1</sup>H-NMR, 600 MHz, C<sub>6</sub>D<sub>6</sub>, 285 K, δ 5.805, dd, 1H, H9, J<sub>8,9</sub> = 5.3 Hz, J<sub>9,10</sub> = 15.5 Hz; 5.67, 1H, H10, J<sub>9,10</sub> = 15.5 Hz, J<sub>10,11</sub> = 7.2 Hz; 5.49, m, 2H, H14, H15; 5.35, m, 2H, H5, H6; 3.93, m, 1H, H8; 3.32, s, 3H, OCH<sub>3</sub>; 3.24, dd, 1H, H11, J<sub>10,11</sub> = 7 Hz, J<sub>11,12</sub> = 4 Hz; 2.94, dt, 1H, H12, J<sub>11,12</sub> = 4 Hz, J<sub>12,13</sub> = 6.3 Hz; 2.42, m, 1H, H13a; 2.195, m, 1H, H13b; ~2.18 - 2.08, m, 2H, H7a,7b; 2.05, 7, 2H, H2; 1.97, q, 2H, H16; 1.89, q, 2H, H4; 1.55, p, 2H, H3; 1.32 - 1.20, m, 6H, H17, H18, H19; 0.89, t, 3H, H20.

### **8S-HETE + cAOS + PhIO product (8S-hydroxy-9R,10R-epoxy-eicosa-5Z,9E,14Z-trienoate (methyl ester)**

This 8,9-*threo* diastereomer was the only 9,10-epoxide formed by reaction of 8S-HETE with cAOS+PhIO (Fig 5, main text). It is the enantiomer of the 8R-HETE *threo* product, with an identical NMR spectrum.

### mCPBA products from 8R-HETE

As the methyl esters, these eluted on RP-HPLC (MeOH/H<sub>2</sub>O, ) as:

- RP1 (products a<sub>1</sub> and a<sub>2</sub>) - a mixture of 14,15-epoxy diastereomers
- RP2/RP3 (products b<sub>1</sub> and b<sub>2</sub>) - two 11,12-epoxy diastereomers, partly resolved by RP-HPLC
- RP4/RP5 (products c<sub>1</sub> and c<sub>2</sub>) - two 5,6-epoxy diastereomers, partly resolved by RP-HPLC
- RP6 (Products 1 and 2) - the *erythro* and *threo* 9,10-epoxy diastereomers

The pairs of diastereomers were well resolved using a Chiralpak AD column (25 x 0.46 cm) with a solvent system of Hexane/EtOH/MeOH (100:5:5, v/v/v), flow rate 1 ml/min.

Retention volumes:

- RP1 20.1 ml and 42.6 ml (8-hydroxy, 14,15-epoxy)
- RP2 11.6 ml (8-hydroxy, 11,12-epoxy)
- RP3 6.6 ml (8-hydroxy, 11,12-epoxy)
- RP4 14.9 ml (8-hydroxy, 5,6-epoxy)
- RP5 10.2 ml (8-hydroxy, 5,6-epoxy)
- RP6 9.4 ml (*threo*), 12.8 ml (*erythro*) 8-hydroxy, 9,10-epoxy

**Fig. 2B (main text) products a<sub>1,2</sub>: two mCPBA products, diastereomers of 8R-hydroxy-14,15-epoxy-eicosa-5Z,9E,11Z-trienoate methyl ester** (NMR data not recorded – but see 8S-HETE product, a 14,15-epoxide)

**Fig. 2B (main text) products b<sub>1,2</sub>: two mCPBA products, diastereomers of 8R-hydroxy-11,12-epoxy-eicosa-5Z,9E,14Z-trienoate methyl ester** These had indistinguishable NMR spectra from each other and from the 11,12-epoxy product from 8S-HETE + cAOS + PhIO.

**Fig. 2B (main text) product c<sub>1</sub>: mCPBA product, 5,6-epoxy-8R-hydroxy-eicosa-9E,11Z,14Z-trienoate methyl ester**

(the **first diastereomer** to elute, as the methyl ester, on RP-HPLC using MeOH/H<sub>2</sub>O solvent)

<sup>1</sup>H-NMR, 600 MHz, C<sub>6</sub>D<sub>6</sub>, δ 6.765, dd, 1H, H10, J<sub>9,10</sub> = 15.1 Hz, J<sub>10,11</sub> = 11.2 Hz; 6.085, t, 1H, H11, J = 11.1 Hz; 5.625, dd, 1H, H9, J<sub>9,10</sub> = 15.1 Hz, J<sub>8,9</sub> = 6.1; 5.50-5.42, m, 6H, H12, H14, H15; 4.285, q, 1H, H8, J = 6 Hz; 3.30, s, 3H, OCH<sub>3</sub>; 2.98, t, 2H, H13, J = 6 Hz; 2.80, dt, 1H, H6, J<sub>5,6</sub> = 4.2 Hz, J<sub>6,7</sub> = 6.2 Hz; 2.52, dt, 1H, H5, J<sub>4,5</sub> = 6.2 Hz, J<sub>5,6</sub> = 4.2 Hz; ~2.07-1.97, m, 4H, H2, H16; 1.58 -1.52, m, 4H, H3, H7; 1.31, m, H4; ~1.28 – 1.20, m, 6H, H17, H18, H19; 0.89, t, 3H, H20.

**Fig. 2B (main text) product c<sub>2</sub>: mCPBA product, 5,6-epoxy-8R-hydroxy-eicosa-9E,11Z,14Z-trienoate methyl ester**

(the **second diastereomer** to elute, as the methyl ester, on RP-HPLC using MeOH/H<sub>2</sub>O solvent). There are significant differences in the chemical shifts compared to the first diastereomer, e.g. on the protons in the conjugated diene, and especially noticeable is the more downfield position of H6.

<sup>1</sup>H-NMR, 600 MHz, C<sub>6</sub>D<sub>6</sub>, 285 K, δ 6.65, dd, 1H, H10, J<sub>9,10</sub> = 15 Hz, J<sub>10,11</sub> = 11 Hz; 6.04, t, 1H, H11, J = 10.9 Hz; 5.585, dd, 1H, H9, J<sub>9,10</sub> = 15.1 Hz, J<sub>8,9</sub> = 6.0; 5.46, m, 6H, H12, H14, H15; 4.21, m, 1H, H8; 3.30, s, 3H, OCH<sub>3</sub>; 3.02, m (ddd?), 1H, H6; 2.97, t, 2H, H13, J = 7.5 Hz; 2.61, dt, 1H, H5, J<sub>4,5</sub> = 6.2 Hz, J<sub>5,6</sub> = 4.2 Hz; ~2.09-1.99, m, 4H, H2, H16; 1.595, m, 3H, H3, H7a; 1.505, ddd, H7b; ~1.34 – 1.20, m, 8H, H4, H17, H18, H19; 0.89, t, 3H, H20.

**Fig. 2B (main text) products 1 and 2: two mCPBA products, diastereomers of 8R-hydroxy-9,10-epoxy-eicosa-5Z,9E,14Z-trienoate methyl ester** NMR data given above as Products 1 and 2.

#### SI References

1. Wei S, *et al.* (2006) Chiral resolution of the epoxyeicosatrienoic acids, arachidonic acid epoxygenase metabolites. *Anal. Biochem.* 352:129-134.
2. Brash AR, Boeglin WE, Capdevila JH, Suresh Y, Blair IA (1995) 7-HETE, 10-HETE, and 13-HETE are major products of NADPH-dependent metabolism of arachidonic acid in rat liver microsomes. Analysis of their stereochemistry and the stereochemistry of their acid-catalyzed rearrangement. *Arch. Biochem. Biophys.* 321:485-492.
